1 **The effect of ocean warming on black sea bass (*Centropristis striata*) aerobic scope and**  
2 **hypoxia tolerance**

3  
4 Ocean warming and *C. striata* physiology

5  
6 Emily Slesinger<sup>1\*</sup>, Alyssa Andres<sup>2</sup>, Rachael Young<sup>1</sup>, Brad Seibel<sup>2</sup>, Vincent Saba<sup>3</sup>, Beth Phelan<sup>4</sup>,  
7 John Rosendale<sup>4</sup>, Dan Wieczorek<sup>4</sup>, Grace Saba<sup>1</sup>

8  
9 <sup>1</sup> Center for Ocean Observing Leadership, Department of Marine and Coastal Sciences, School of  
10 Environmental and Biological Sciences, Rutgers University, New Brunswick, NJ 08901, USA

11 <sup>2</sup> College of Marine Science, University of South Florida, St. Petersburg, FL 33701, USA

12 <sup>3</sup> NOAA Northeast Fisheries Science Center, Geophysical Fluid Dynamics Laboratory,  
13 Princeton, NJ 08540

14 <sup>4</sup> NOAA Northeast Fisheries Science Center, James J. Howard Laboratory, Highlands, NJ 07732

15 \*Corresponding Author: [slesinger@marine.rutgers.edu](mailto:slesinger@marine.rutgers.edu), 848-932-3452

16  
17 **Key Words**

18 Black sea bass, *Centropristis striata*, climate change, metabolic index, aerobic scope  
19  
20  
21  
22  
23  
24  
25  
26  
27  
28  
29  
30  
31  
32  
33  
34  
35  
36  
37  
38  
39  
40  
41  
42  
43  
44  
45

## 46 **Summary Statement**

47 Laboratory-based physiological studies focused on aerobic scope and hypoxia tolerance of black  
48 sea bass presented here support the recently observed poleward shift of their range on the U.S.  
49 Northeast Shelf.

50

## 51 **Abstract**

52 Over the last decade, ocean temperature in the U.S. Northeast Continental Shelf (U.S. NES) has  
53 warmed faster than the global average and is associated with observed distribution changes of the  
54 northern stock of black sea bass (*Centropristis striata*). Mechanistic models based on  
55 physiological responses to environmental conditions can improve future habitat suitability  
56 projections. We measured maximum (MMR), resting metabolic rate (RMR), and hypoxia  
57 tolerance ( $S_{crit}$ ) of the northern adult black sea bass stock to assess performance across the known  
58 temperature range of the species. A subset of individuals was held at 30°C for one month  
59 (30<sub>chronic</sub>°C) prior to experiments to test acclimation potential. MMR and absolute aerobic scope  
60 (AAS = MMR-RMR) reached a maximum at 24.4°C (AS: 367.21 mgO<sub>2</sub> kg<sup>-1</sup> hr<sup>-1</sup>) while  $S_{crit}$   
61 continued to increase in proportion to RMR up to 30°C. The 30<sub>chronic</sub>°C group had a significant  
62 decrease in MMR and AAS but RMR or  $S_{crit}$  were not affected. This suggests a decline in  
63 performance of oxygen demand processes (e.g. muscle contraction) beyond 24°C despite  
64 maintenance of oxygen supply. The Metabolic Index, calculated from  $S_{crit}$  as an estimate of  
65 potential aerobic scope, closely matched the measured factorial aerobic scope (FAS =  
66 MMR/RMR) and declined with increasing temperature to a minimum below 3. This may  
67 represent a critical value for the species. Temperature in the U.S. NES is projected to increase  
68 above 24°C in the southern portion of the northern stock's range. Therefore, these black sea bass  
69 will likely continue to shift north as the ocean continues to warm.

70

## 71 **Introduction**

72 Marine environments are progressively warming as a consequence of climate change  
73 (Belkin, 2009). Along the U.S. Northeast Shelf (U.S. NES), ocean temperature is rising faster  
74 than the global average (Pershing *et al.*, 2015; Caesar *et al.*, 2018) resulting in a significant  
75 temperature increase (Friedland and Hare, 2007; Kavanaugh *et al.*, 2017). Sea surface and  
76 bottom temperatures in the U.S. NES are projected to rise an additional 4.1°C and 5.0°C,

77 respectively, along the U.S. NES (Saba *et al.*, 2016; Kleisner *et al.*, 2017). Contemporary ocean  
78 warming in the U.S. NES has been associated with distribution shifts of many economically and  
79 ecologically important fish species both in latitude and/or depth (Nye *et al.*, 2009; Bell *et al.*,  
80 2015; Kleisner *et al.*, 2016, 2017; Morley *et al.*, 2018), associated with tracking local climate  
81 velocities (Pinsky *et al.*, 2013). Understanding and projecting shifts in fish distribution will be  
82 important for characterizing potential ecological and economic impacts and anticipating and  
83 resolving fishery management conflicts (Pinsky *et al.*, 2018).

84 Temperature directly affects metabolic rates of marine ectotherms (Clarke and Johnston,  
85 1999; Verberk *et al.*, 2016) and is believed to set the boundaries of species ranges (Pörtner and  
86 Farrell, 2008; Deutsch *et al.*, 2015). One explanation for the effects of temperature on  
87 ectothermic species, oxygen and capacity-limited thermal tolerance (OCLTT; Pörtner, 2010),  
88 postulates that thermal limitation occurs due to a mismatch in oxygen demand and supply at sub-  
89 optimal temperatures, which ultimately determines suitable thermal habitat (Pörtner and Knust,  
90 2007). In this framework, the thermal optimum occurs where absolute aerobic scope (AAS), the  
91 difference between maximum (MMR) and resting metabolic rate (RMR) (Schulte, 2015), is  
92 highest. RMR is the cost of maintenance for an organism and increases with temperature (Clarke  
93 and Johnston, 1999). MMR may be constrained differently across a temperature range by oxygen  
94 uptake, transport or utilization. The drop in AAS beyond the thermal optimum is associated with  
95 the failure of MMR to increase relative to the continuing rate of increase in RMR (Farrell, 2016).  
96 Absolute AAS is thought to represent the capacity for oxygen uptake, beyond that supporting  
97 maintenance metabolism, that can be utilized for activities that promote individual fitness (e.g.  
98 growth, reproduction, predator avoidance; Pörtner & Peck 2010). Hence, the adaptive benefit of  
99 living at suitable temperatures to maintain metabolic scope may provide a mechanistic  
100 explanation for where fish may be distributed in their environment.

101 While the general distribution of fishes is broadly confined by thermal preferences,  
102 oxygen availability can further constrain suitable habitat. The hypoxia tolerance of a fish can be  
103 estimated as the critical oxygen saturation level ( $S_{crit}$ ), the %O<sub>2</sub> below which oxygen supply  
104 cannot match the demands of maintenance metabolism. Further reductions in %O<sub>2</sub> cause a  
105 proportional decrease in RMR (Schurmann and Steffensen, 1997). Below the  $S_{crit}$ , a fish has  
106 time-limited survival as ATP production progressively relies on unsustainable anaerobic  
107 pathways and metabolic suppression (Nilsson and Renshaw, 2004; Seibel, 2011). Generally, a

108 fish with a low  $S_{crit}$  is tolerant of lower sustained oxygen levels (Claireaux and Chabot, 2016). As  
109 ocean temperature increases, oxygen demand concomitantly increases (Del Toro-Silva *et al.*,  
110 2008; Capossela *et al.*, 2012), potentially reducing hypoxia tolerance (Collins *et al.*, 2013;  
111 McDonnell and Chapman, 2015). The  $S_{crit}$  further provides a means of calibrating the Metabolic  
112 Index, which is a ratio of oxygen supply to demand that provides an estimate of sustained  
113 factorial aerobic scope and metabolically suitable habitat (Deutsch *et al.*, 2015). At  $S_{crit}$ , by  
114 definition, supply exactly matches demand allowing statistical estimation of the equations'  
115 physiological parameters.

116 The northern stock of black sea bass (*Centropristis striata*) on the U.S. NES extends from  
117 Cape Hatteras to the Gulf of Maine and is centered in the Mid-Atlantic Bight (MAB; Roy *et al.*,  
118 2012). These fish seasonally migrate from the continental shelf edge in cooler months to inshore  
119 depths (5-50m) in warmer months (Musick and Mercer, 1977; Moser and Shepherd, 2008).  
120 Seasonally migrating black sea bass thus experience a wide range of temperatures throughout the  
121 year, ranging from 6°C during winter and up to 27°C during summer/early fall months (Steimle  
122 *et al.*, 1999). Off the coast of New Jersey, periodic hypoxic events can occur during the summer  
123 as a result of high biological activity (Schofield *et al.*, 2012) fueled by upwelling of nutrient rich  
124 waters (Glenn *et al.*, 2004). Therefore, during the warm summer months, black sea bass are  
125 potentially subject to hypoxia in this region, contributing to the oxygen limitation that contains  
126 suitable habitat.

127 The northern stock of black sea bass may already be exhibiting poleward shifts, likely  
128 due to ocean warming (Hare *et al.*, 2016; Kleisner *et al.*, 2017). Evidence for current black sea  
129 bass distribution shifts comes primarily from bottom trawl survey data (Kleisner *et al.*, 2017),  
130 and is supported anecdotally through fishermen. Laboratory-based process studies focused on the  
131 physiology of an organism provide detailed mechanistic relationships between the environment  
132 and the animal (Wikelski and Cooke, 2006). The objectives of this study were to determine the  
133 AAS and  $S_{crit}$  for the northern stock of adult black sea bass. We measured AAS and  $S_{crit}$  at a  
134 range of temperatures similar to those experienced by black sea bass during their summer inshore  
135 residency to compare thermal optima, if present, and metabolic index against the known  
136 temperature range of the species. Results from these physiological studies may be useful for  
137 modeling suitable habitat based on environmental parameters (Lefevre *et al.*, 2017) and model

138 black sea bass distributions (e.g., Manderson *et al.*, 2011; Deutsch *et al.*, 2015), and projecting  
139 future distribution shifts in black sea bass with continued ocean warming.

140

## 141 **Methods**

### 142 *Fish Collection and Husbandry*

143 Adult black sea bass (*Centropristis striata*) from the northern stock (length = 221-  
144 398mm; weight = 193.7-700.4g) were collected off the coast of New Jersey, USA at depths of  
145 15-20m in early June from Sea Girt and Manasquan Reefs by fish traps (2016), and from local  
146 reefs off Sandy Hook by hook-and-line (2017). Fish were housed in the NOAA James J. Howard  
147 Marine Laboratory, held at ambient temperature ( $22 \pm 1^\circ\text{C}$ ) and salinity (26ppt), maintained at a  
148 natural photoperiod for New Jersey summer, and fed daily to satiation on a diet of sand lance and  
149 silversides. Water temperature and salinity was monitored daily using a YSI (Pro-30; Yellow  
150 Springs, Ohio, USA), and water chemistry remained at suitable levels ( $< 20 \mu\text{M}$  nitrate,  
151 undetectable nitrite,  $< 0.05 \mu\text{M}$  ammonia, pH range of 7.98-8.04). Fish were acclimated to  
152 captive conditions two weeks prior to the trials, after which all experimental fish ate regularly  
153 and were in good condition. Any fish exhibiting apparent health issues (i.e. lack of appetite,  
154 difficulties with buoyancy or orientation) were not used in experiments. After acclimation, fish  
155 were measured for length (TL mm), weight (g), and tagged with individually numbered T-bar  
156 Floy tags inserted underneath the dorsal rays. For each temperature treatment, fish were  
157 acclimated at a rate of  $2^\circ\text{C day}^{-1}$  to reach experimental temperature, then held at the target  
158 treatment temperature for at least 48hr prior to the start of experiments. Fish were starved 48hr  
159 prior to the start of each experiment to eliminate effects of specific dynamic action (Chabot *et*  
160 *al.*, 2016a). At the end of each experiment, fish were euthanized with an overdose of MS-222  
161 ( $250 \text{ mgL}^{-1}$ ). Fish were collected under New Jersey permits #1610 & #1717. Treatment of all  
162 animals was held in accordance with Rutgers IACUC protocol 15-054.

163

### 164 *Experimental Set-Up*

165 Experimental tanks (1,200L) were filled with treated seawater from Sandy Hook Bay that  
166 continuously circulated through a closed system. Circulating seawater was treated using filters  
167 (sand and biological) and UV-light, and salinity was adjusted to mimic average summertime  
168 inshore NJ bottom water ( $32 \pm 1$ ). Experimental temperatures were achieved using in-line chillers

169 (Aqua Logic Delta Star; San Diego, California, USA) and/or titanium exchanger heaters  
170 (Innovative Heat Concepts, Homestead, Florida, USA), and maintained at  $\pm 1^\circ\text{C}$  from target  
171 temperature.

172 Metabolic rates were measured using intermittent respirometry under the protocols  
173 outlined in Clark *et al.*, (2013) and Svendsen *et al.*, (2016a). Flow-through respirometers (13.5  
174 liter volume; 23[H]x26[W]x37[L] cm plexiglass) were placed into the two experimental tanks  
175 (two respirometers per tank; four respirometers per trial). Flush pumps (Eheim Universal 600  
176 l/h; Deizisau, Germany) connected to the respirometer were used to pull water from the  
177 surrounding temperature bath to replenish dissolved oxygen and eliminate metabolic waste  
178 buildup within the respirometer. The duration and timing of flushes set the intermittent cycles,  
179 which were controlled through a pre-determined time sequence using a DAQ-M instrument  
180 (Loligo Systems; Viborg, Denmark), and were set based on the trial temperature so that oxygen  
181 saturation was never below 75% (Svendsen *et al.*, 2016b). For each closed measure period  
182 (when flush pumps were off), the rate of decline in dissolved oxygen concentration within the  
183 sealed chamber was used to calculate a mass specific rate of oxygen consumption, or metabolic  
184 rate ( $\text{MO}_2$ :  $\text{mgO}_2 \text{ kg}^{-1} \text{ hr}^{-1}$ ). A closed recirculation loop connected with a smaller pump (Eheim  
185 Universal 300 l/h; Deizisau, Germany) was also utilized to uniformly disperse dissolved oxygen  
186 within the chamber and provide waterflow across the oxygen dipping probe optical mini sensor  
187 (PreSens Pst3; Regensburg, Germany). Oxygen probes were calibrated in accordance with the  
188 supplier's manual (Oxygen dipping probe PSt3, PreSens GmbH, Regensburg, Germany) and  
189 checked with a YSI (ProSolo ODO; Yellow Springs, Ohio, USA) that was calibrated in 100%  
190 and 0% oxygen saturation sample waters. Autoresp computer software (Loligo Systems; Viborg,  
191 Denmark) and a Witrox-4 instrument (Loligo Systems; Viborg, Denmark) were used to  
192 continuously monitor dissolved oxygen and temperature within the chamber over the course of  
193 the experiment.

194 For hypoxia experiments, intermittent respirometry was also used to avoid a  $\text{CO}_2$  and  
195 metabolite build up (Rodgers et al. 2016). Each respirometer flush pump was connected to an  
196 external water bath that was filled with the same system water. Within the external water bath, a  
197 pump (Eheim Universal 1200 l/h; Deizisau, Germany) connected to a piece of Tygon tubing held  
198 an oxygen optode to monitor source  $\text{O}_2$  and served as a mixing device. Also within the external  
199 water bath, four small microdiffusers were connected to a  $\text{N}_2$  gas canister (Schurmann and

200 Steffensen, 1997) to allow for diffusion of nitrogen gas into the external bath and subsequent  
201 displacement of O<sub>2</sub> within the external water bath and control of environmental %O<sub>2</sub> within the  
202 chambers over the course of the hypoxia experiment.

203 Background respiration was measured by taking background MO<sub>2</sub> (MO<sub>2br</sub>) pre- and post-  
204 trial in empty chambers for ~1.5hr. A linear regression between pre- and post-MO<sub>2br</sub> was used to  
205 apply a correction factor to each MO<sub>2</sub> value recorded throughout an experiment.

206 Experiments were conducted at a range of temperatures (12, 17, 22, 24, 27 and 30°C). An  
207 additional subset of black sea bass were held at 30°C for one month to test acclimation potential  
208 (Table 1). We used two different methods in an attempt to elicit maximum metabolic rate  
209 (MMR): exhaustive-chase and swim-flume. For the chase method, individual black sea bass  
210 (Table 1) were placed in a 4ft-diameter chase tank filled with water from the experimental tanks.  
211 Fish were chased via tactile stimulation on the caudal tail and were determined exhausted when  
212 unresponsive to further tactile stimulation and air exposure. Fish were then immediately  
213 transferred to individual respirometers that were sealed within ~1 min from the end of the chase  
214 and remained in the metabolic chambers for ~23hr allowing for resting metabolic rate (RMR)  
215 measurement (Chabot *et al.*, 2016b). Once the experiment was finished, fish were either  
216 exercised in a swim-flume (Loligo Systems 90L; Viborg, Denmark) after a 24hr rest period or  
217 remained in the chamber for the hypoxia experiments. For the swim-flume, fish were tested  
218 using a sprint protocol. Swimming speed was increased over a 5min period up to 0.95 BL s<sup>-1</sup> with  
219 a flush pump on as the fish adjusted to the flume. After an adjustment time (~10 minutes), the  
220 speed was increased over a period of 5 minutes until the fish was sprinting (designated as >10  
221 tail bursts during 30s intervals and an inability to maintain position in the working section  
222 without burst swimming). Once a fish was sprinting, the flush pump was turned off and the  
223 flume was sealed. Fish were held at their sprint speed for at least 10 minutes or until failure,  
224 determined when the fish rested at the backgate for >10s. Aerobic scope was calculated in  
225 absolute (AAS = MMR-RMR) and factorial terms (FAS = MMR/RMR). An additional subset of  
226 black sea bass was held at 30°C for one month to test acclimation potential. In 2016, fish were  
227 only tested at 24, 27, and 30°C due to restrictions in maintaining temperatures. See Table 1 for  
228 sample size at each temperature.

229

230 *Critical %O<sub>2</sub> determinations*

231 Hypoxia ( $S_{crit}$ ) experiments were conducted on the last 4 fish of each temperature  
232 treatment trial. This allowed us to reliably use fish that were already acclimated to the  
233 respirometers and had reached RMR overnight. Starting with 100% dissolved oxygen (DO)  
234 saturation within the chambers, environmental %O<sub>2</sub> was incrementally decreased by 10%. Three  
235 intermittent (flush, wait, measure) cycles were measured per DO level until  $S_{crit}$  was determined  
236 to have been reached, indicated by a substantial decline in fish metabolic rate or loss of  
237 equilibrium, and the experiment ended.

238

### 239 *Data Analysis*

240 Fish MO<sub>2</sub> was calculated via the AutoResp program from the slope of oxygen saturation  
241 decline during each closed measurement period. Validation of each MO<sub>2</sub> value was conducted  
242 using R<sub>2</sub> values from each measure period. MO<sub>2</sub> measurements with R<sub>2</sub> values < 0.9 were not  
243 used.

244 We report our baseline metabolic rate as resting (RMR) instead of standard (SMR)  
245 metabolic rate because the amount of time in the chamber was ~23 hours, which does not allow  
246 for determination of full diel cycles (Chabot *et al.*, 2016b). RMR was calculated from a  
247 truncated dataset without the first two hours of elevated MO<sub>2</sub> values following exercise and by  
248 using the 20th quantile of the RMR data in the *calcSMR* package in R (Chabot *et al.*, 2016b).  
249 Briefly, a frequency distribution of MO<sub>2</sub> values from the truncated data set was created and the  
250 values at the 20<sup>th</sup> quantile were taken to calculate RMR. MMR in the chase protocol was defined  
251 as the highest MO<sub>2</sub> value recorded during the trial and MMR was calculated for the duration of  
252 the sprint interval in the swim-flume. AAS was taken as the difference between MMR and RMR.  
253 There was a significant effect of mass on MO<sub>2</sub> ( $F_{1,117} = 4.651$ ;  $P < 0.05$ ; Fig. 1). Therefore, the  
254 effect of temperature on MO<sub>2</sub> was analyzed using a one-way ANCOVA with weight as a  
255 covariate. A Tukey's HSD *post hoc* was used to determine significant pair-wise comparisons  
256 between temperatures. MO<sub>2</sub> was adjusted for weight using the estimated marginal means from  
257 the ANCOVA centered around a fish mean weight of 346.9g. Because the average weight of fish  
258 in the 24°C treatment (253.9g) was lower than the mean weight of all other experimental fish, the  
259 adjusted MO<sub>2</sub> for 24°C was slightly overestimated and had larger standard error for AAS and  
260 MMR. Curves for aerobic scope were modeled using a 3<sup>rd</sup> degree polynomial fit and were used



261 to estimate a thermal optimum (temperature at the highest AS). All graphs and results report the  
262 adjusted MO<sub>2</sub> (MO<sub>2adj</sub>).

263 Q<sub>10</sub> values were calculated for the adjusted MO<sub>2</sub> between temperature increments, and  
264 between the range of temperatures using the formula:

$$265 \quad Q_{10} = \frac{R_2^{10/(T_2-T_1)}}{R_1}$$

266 where Q<sub>10</sub> is the temperature coefficient for MO<sub>2</sub>, R<sub>1</sub> is the MO<sub>2</sub> at T<sub>1</sub> and R<sub>2</sub> is the MO<sub>2</sub> at T<sub>2</sub>.  
267 S<sub>crit</sub> was determined by fitting two regression lines through the data: one through the region  
268 where RMR was independent of %O<sub>2</sub> and one through the portion where MO<sub>2</sub> decreased linearly  
269 with a decrease in %O<sub>2</sub>. The intersection of the two regression lines is the critical point used for  
270 S<sub>crit</sub> (Yeager and Ultsch, 1989). This was analyzed using R code in the *calcO2crit* package from  
271 Claireaux and Chabot (2016). Because we had a sample size of 4 fish per temperature trial, a  
272 power analysis was run to determine the statistical power of this small sample size and four fish  
273 provided enough statistical power (*Power* = 1, *n* = 4, *f* = 1.71, *sig. level* = 0.05). A one-way  
274 ANOVA was used to assess the effect of temperature on S<sub>crit</sub> and a Tukey's HSD *post hoc* test  
275 was used to determine significant pair-wise comparisons between temperatures.

276 All statistical analyses were performed in R (Version 3.4.1). Data were checked for  
277 assumptions of normality by the visual Q-Q norm plot and statistically with the Shapiro-Wilk  
278 test where *P* > 0.05 indicate normally distributed data. Assumptions of homogeneity were  
279 assessed using the Levene's test where a *P* > 0.05 indicates homogeneity. Data that did not fit  
280 assumptions of normality were log-transformed prior to further statistical analysis. Data are  
281 presented as mean ± SE and results from statistical analyses are defined as significant at *P* <  
282 0.05.

283

## 284 **Results**

### 285 *Metabolic rates and aerobic scope*

286 RMR increased significantly with temperature (Figs 2a and 2b) and there was a  
287 significant effect of weight and temperature\*weight interaction on RMR (*P* < 0.05; Table 2).  
288 While the results for the two MMR methods differed considerably, temperature, weight and  
289 temperature\*weight interaction all had a significant effect on MMR using either method (*P* <  
290 0.05; Table 2). The chase MMR increased continuously with temperature, while flume MMR

291 increased with temperature until  $\sim 22^{\circ}\text{C}$  (Fig 2a & 2b). The MMR values from the flume were  
292 consistently higher across the temperature range than from the chase method, indicating that the  
293 metabolic rate reached during the chase likely was not the maximum possible for this species.

294 While the chase method did not achieve MMR, it still provided an estimate of  
295 submaximal exercise performance across a temperature range. The MMR using the chase  
296 method increased continuously with temperature and reached a maximum adjusted value of  
297  $396.65 \pm 11.48 \text{ mg O}_2 \text{ kg}^{-1} \text{ hr}^{-1}$  at  $30.0^{\circ}\text{C}$  (the highest temperature measured; Table 3; Fig 1a).  
298 The MMR measured using the flume reached a maximum of  $497.96 \pm 21.92 \text{ mg O}_2 \text{ kg}^{-1} \text{ hr}^{-1}$  at  
299  $27^{\circ}\text{C}$  (Table 3; Fig 1b). The absolute aerobic scope using the flume method reached a  
300 maximum, typically referred to as “ $T_{\text{opt}}$ ” at  $\sim 24.4^{\circ}\text{C}$  (Fig. 2B). There was a significant effect of  
301 temperature, weight, and the temperature\*weight interaction on AAS ( $P < 0.05$ ) using both  
302 MMR methods (Table 2). Using different MMR methods resulted in differences in the shape of  
303 the AAS curve and the estimated thermal optimum with consequences for its interpretation. All  
304 RMR, MMR and AAS values are reported in Table 3 and  $Q_{10}$  values are reported in Table 4.

305

### 306 *Critical %O<sub>2</sub>*

307 The critical %O<sub>2</sub> ( $S_{\text{crit}}$ ) increased significantly with increasing temperature (Fig 4a;  $F_{5,18} =$   
308  $14.023$ ,  $P < 0.05$ ), directly correlated with RMR (Fig 4b). There was no significant difference  
309 between  $12^{\circ}\text{C}$  ( $19.65 \pm 1.72 \text{ \%O}_2$ ),  $17^{\circ}\text{C}$  ( $21.325 \pm 1.75 \text{ \%O}_2$ ) and  $22^{\circ}\text{C}$  ( $21.80 \pm 1.21 \text{ \%O}_2$ ), but  
310  $S_{\text{crit}}$  increased significantly at  $27^{\circ}\text{C}$  ( $31.60 \pm 1.67 \text{ \%O}_2$ ) and further at  $30^{\circ}\text{C}$  ( $37.875 \pm 3.39 \text{ \%O}_2$ ).  
311 However, non-significance between 12, 17 and  $22^{\circ}\text{C}$  could be due to low sample size.

312

### 313 *Chronic high temperature exposure*

314 The  $30_{\text{chronic}}^{\circ}\text{C}$  group AAS using both MMR methods significantly decreased when  
315 compared to the  $30^{\circ}\text{C}$  treatment where fish were only held at this temperature for a week. Based  
316 on Tukey *post hoc* differences, RMR did not change significantly between the  $30_{\text{chronic}}^{\circ}\text{C}$  and  
317  $30^{\circ}\text{C}$  treatments but there was a significant decrease in MMR between the  $30^{\circ}\text{C}$  and  $30_{\text{chronic}}^{\circ}\text{C}$   
318 treatments. There was no significant difference in  $S_{\text{crit}}$  between  $30^{\circ}\text{C}$  and  $30_{\text{chronic}}^{\circ}\text{C}$  treatments.

319

## 320 **Discussion**

321           The primary objective of this study was to assess the use of physiological measurements  
322 to determine habitat suitability for the northern stock of black sea bass at current and future  
323 temperatures. We measured the oxygen consumption rate during two different exercise  
324 protocols. The flume yielded much higher metabolic rates, indicating that the chase method did  
325 not elicit MMR. Using the flume MMR, we found that AAS peaked at 24.4°C.  $S_{crit}$  increased  
326 with increasing temperatures as is typical of most (but not all, Wishner et al., 2018) animals,  
327 including fishes (Rogers et al. 2016). Chronic exposure to 30°C resulted in a significant drop in  
328 AAS with no change in RMR or  $S_{crit}$ . That  $S_{crit}$  increased with temperature in proportion to RMR,  
329 while MMR in the flume did not, suggests that chronic exposure to high temperature did not alter  
330 the capacity for oxygen uptake and transport, but that the capacity to generate ATP was reduced,  
331 perhaps due to a decrement in muscle function. The capacity for submaximal exercise (oxygen  
332 consumption following a chase to exhaustion) also increased across the entire temperature range  
333 further suggesting that the failure was not in the capacity for oxygen supply. Chronic exposure  
334 to 30°C led to further reductions in MMR using both methods, but no loss of oxygen supply  
335 capacity as estimated from  $S_{crit}$ , suggesting continued deterioration in muscle function with  
336 longer exposure to warm temperatures.

337           Absolute AS typically increases with temperature up to a point, often termed “optimal”,  
338 and then declines at higher temperatures resulting in a roughly bell-shaped curve as has been  
339 identified in fishes that include, but is not limited to, juvenile European sea bass *Dicentrarchus*  
340 *labrax* (Claireaux et al., 2006), turbot *Scophthalmus maximus* (Mallekh and Lagardere, 2002),  
341 coho salmon *Oncorhynchus kisutch* (Raby et al., 2016), and sockeye salmon *Oncorhynchus*  
342 *nerka* (Farrell et al., 2008). However, some studies have found left- or right-skewed curves (e.g.  
343 Healy and Schulte 2012) while others find that AAS continues to increase up to the critical  
344 temperature for the species (i.e. no temperature optimum for AAS is identifiable; e.g. Norin et al.  
345 2014). In our study, the black sea bass AAS curve was more bell-shaped with an estimated  
346 optimal temperature of 24.4°C. Bottom temperature in the southern portion of the black sea bass  
347 range typically hovers around 24-26°C during the summer (Houghton et al. 1982; Castelao et al.  
348 2008; from U.S. East Coast Regional EPreSSO model, Wilkin and Hunter 2013), which would  
349 suggest this area to be thermally optimal. However, if the loss in AAS at higher temperatures is  
350 due to a failure in muscular performance rather than potential oxygen supply, then 24°C may  
351 represent a maximum tolerable temperature rather than a temperature that allows optimal

352 performance. In support of this interpretation, the Metabolic Index (which closely matches the  
353 factorial aerobic scope) declines with increasing temperature toward levels (~3 at 27°C in black  
354 sea bass) known to limit the geographic range of some species (Deutsch et al., 2015). While the  
355 average bottom temperature in the southern portion of the northern stock of black sea bass is near  
356 24°C during the summer months, there has still been a consistent expansion of their range  
357 northward into lower temperatures (NEFSC 2017) further suggesting that the temperature  
358 eliciting maximum AAS is not, in fact, optimal. It is important to note that AAS is only a  
359 measured capacity to supply oxygen under maximum sustained exercise (Farrell, 2016). The  
360 required scope for other metabolic expenses (i.e. feeding, digestion; Holt and Jørgensen, 2015)  
361 change with temperature in unknown ways and metabolic needs can change seasonally and with  
362 ontogeny (Clark *et al.*, 2013). Thus, AAS may in this case be an inappropriate predictor of  
363 fitness.

364 Black sea bass in the 30<sub>chronic</sub>°C treatment did not acclimate, indicated by no change in  
365 RMR or S<sub>crit</sub> and a significant decrease in their MMR and AS. Norin et al. (2014) similarly found  
366 that MMR and AAS in juvenile barramundi decreased significantly following 5 weeks at the  
367 highest study temperature (38°C). However, unlike black sea bass in our study, the juvenile  
368 barramundi RMR also decreased after the 5-week exposure. This same response has also been  
369 found for short-horn sculpin (*Myoxocephalus scorpius*) whose RMR was restored after being  
370 held at 16°C for 8 weeks to RMR values that were measured at 10°C (Sandblom *et al.*, 2014).  
371 The decrease in RMR can be an acclimation response to lower their energetic costs at high  
372 temperatures, but comes with its own caveats as this sometimes can reduce MMR. Importantly,  
373 black sea bass in the 30<sub>chronic</sub>°C treatment may have suffered stress from long-term captivity,  
374 which could also reduce AAS and time did not permit for a control chronic trial at a cooler  
375 temperature (although all fish were held for at least 5 days). Understanding the acclimation  
376 potential of black sea bass would benefit from future studies focusing on effects of a chronic  
377 treatment at each temperature tested.

378 S<sub>crit</sub> decreased as temperature increased, most likely caused by rising RMR with higher  
379 temperatures, which has been shown in a majority of fish hypoxia studies (e.g. Schurmann and  
380 Steffensen, 1997; although see Wishner et al., 2018). The 30<sub>chronic</sub>°C group did not have a  
381 significant decrease in hypoxia tolerance compared to the 30°C group, which agrees with no  
382 change in RMR between the two 30°C treatments. This suggests that the reduced MMR in

383 30<sub>chronic</sub>°C animals resulted from reduced capacity to generate ATP, rather than to supply  
384 oxygen. Black sea bass had lower S<sub>crit</sub> than striped bass *Morone saxatilis* (Lapointe *et al.*, 2014)  
385 and summer flounder *Paralichthys dentatus* (Capossela *et al.*, 2012), two important species  
386 found throughout the MAB that periodically experience hypoxic water during the summer  
387 months. However, when compared with fish that frequently experience hypoxia, such as  
388 largemouth bass and crucian carp (Yamanaka *et al.*, 2007) and juvenile barramundi (Collins *et*  
389 *al.*, 2013), black sea bass were less hypoxia tolerant, especially in warmer water. Deutsch *et al.*  
390 (2015) proposed a metabolic index (MI), as the ratio of oxygen supply to demand, which is  
391 effectively an estimate of a species' time-averaged aerobic scope. By definition, the MI is equal  
392 to 1 at the S<sub>crit</sub>. A minimum MI of 2-5, indicating the capacity to supply oxygen at 2-5x the rate  
393 required at rest, is supportive of a population and delineates the equatorward distribution limit in  
394 the few species studied to date. Black sea bass factorial AS and MI both decreased with  
395 increasing temperature (Fig. 6). During the summer months when bottom water temperature is  
396 warmest along the coastal MAB, periodic hypoxic events occur after large phytoplankton blooms  
397 in the surface waters. In the past, these hypoxic events decreased bottom water PO<sub>2</sub> below  
398 ~5.5kPa (26% saturation; 2.2 mg L<sup>-1</sup> at 14°C Schofield *et al.* 2012), providing a metabolic index  
399 of ~1.3 at those temperatures for black sea bass. Such environments can be tolerated for short  
400 periods but are not likely supportive of a thriving population. At 30°C, even air-saturated water  
401 provides a MI of only 2.6 which is near the physiological limits of many species (Deutsch *et al.*,  
402 2015). Therefore, when determining the suitable habitat, both temperature and oxygen must be  
403 taken into consideration as the interacting effects of these variables will effectively decrease  
404 optimal thermal habitat.

405 The chase method did not elicit MMR in black sea bass since MMR from the flume  
406 method was consistently higher. Which method, chase or flume, provides a more reliable  
407 measure of MMR and AAS is actively debated (Norin and Clark, 2016; Killen *et al.*, 2017).  
408 Whether a maximum rate of oxygen uptake is achieved by either method could depend on the  
409 type of swimming the study fish species naturally exhibits in the wild. Norin *et al.* (2014)  
410 purposefully used a chase method for juvenile barramundi (*Lates calcarifer*), an ambush  
411 predator, that typically swims in quick bursts. In other cases, a fish will exhibit marked post-  
412 exercise oxygen consumption (EPOC; Plambech *et al.*, 2013), sometimes eliciting MMR minutes  
413 to hours after the cessation of exercise (Reidy *et al.*, 1995). The swim flume method may be

414 more appropriate for endurance swimming exhibited by pelagic fish such as tunas (Killen *et al.*,  
415 2017). Different MMR methods may promote a certain type of swimming which could exhaust a  
416 fish before reaching MMR by depleting anaerobic stores, a noteworthy contributor to AAS  
417 (Ejbye-Ernst *et al.*, 2016). For this study, we employed a sprint protocol for the swim-flume,  
418 which prompted similar burst swimming as in the chase method. However, during the chase  
419 protocol, black sea bass switched almost immediately to burst swimming accompanied with  
420 quick turning/flipping movements, compared to a slower transition and continuously straight  
421 burst swimming in the swim flume. The differences in MMR between the two methods could  
422 have been related to different swimming types, durations and/or speeds which could recruit more  
423 anaerobic resources (Svendsen *et al.*, 2010) in the chase method, leading to exhaustion before  
424 reaching MMR.

425 In summary, the results from this study indicate that the northern stock of black sea bass  
426 reach a peak in AAS at  $\sim 24^{\circ}\text{C}$ , which is warmer than in the northern portion of their range in the  
427 U.S. NES. The MI of 3.8 in air-saturated water, calculated from  $S_{\text{crit}}$  at  $24^{\circ}\text{C}$ , suggests relatively  
428 limited scope for sustained activity at that temperature (Deutsch *et al.*, 2015). We suggest that,  
429 rather than an optimal temperature, the peak in MMR and AAS indicates the maximum tolerable  
430 temperature, beyond which black sea bass experience a failure in some subcellular or organ  
431 systems that contribute to muscle performance. Our study only used individuals from the  
432 northern stock that were collected during the summer off of the New Jersey coastline. Metabolic  
433 research on the southern stock (south of Cape Hatteras, NC) and/or individuals from the northern  
434 stock in waters outside of New Jersey could reveal variation in some of these physiological  
435 metrics. However, the distribution of the northern stock of black sea bass has shifted northward  
436 (Kleisner *et al.*, 2017) and this newly expanded habitat is almost  $10^{\circ}\text{C}$  colder than their apparent  
437 thermal optimum for AAS. We believe the preference for cooler waters reflects physiological  
438 limitation at higher temperatures, including possible limitation of oxygen supply relative to  
439 demand for growth and reproduction (reduced Metabolic Index) despite maintenance of oxygen  
440 supply capacity. However, many other factors, including food availability, additional energetic  
441 costs (e.g., evading predators, mating), or lower optimal temperatures for other critical processes  
442 may be important. This suggests AAS may not be the most appropriate predictor for habitat  
443 suitability in this species. Additionally, the northern stock of black sea bass population size has  
444 been increasing in the last decade (NEFSC 2017), and this increase in biomass could be pushing

445 part of the population northward. Regardless, the chronic exposure experiments presented here  
446 suggest little capacity for physiological adjustment to future temperatures. Black sea bass  
447 thermal habitat may shrink considerably in the southern region of the MAB as bottom water  
448 temperatures reach  $>27^{\circ}\text{C}$  and continue to expand into the northern region of the MAB as ocean  
449 waters continue to warm, significantly impacting fisheries in these two regions.

450

#### 451 **Acknowledgements**

452 We thank Doug Zemeckis and Captain Chad Hacker (R/V Tagged Fish) for helping us collect  
453 black sea bass; Richard Brill and Andrij Horodysky for providing insight and suggestions for the  
454 study design; and the students at the Marine and Science Technology Academy for their  
455 assistance in animal husbandry. We also acknowledge the NOAA James J. Howard Laboratory  
456 personnel for their support and help throughout the study.

457

#### 458 **Competing Interests**

459 The authors declare no competing interests.

460

#### 461 **Funding**

462 The research was supported by the NOAA Office of Oceanic and Atmospheric Research (OAR),  
463 Coastal and Ocean Climate Applications (COCA) Program (NA15OAR4310119).

464

#### 465 **List of Abbreviations**

|     |                           |                                    |
|-----|---------------------------|------------------------------------|
| 466 | AAS                       | Absolute aerobic scope             |
| 467 | FAS                       | Factorial aerobic scope            |
| 468 | $\text{MO}_2$             | Oxygen consumption rate            |
| 469 | $\text{MO}_{2\text{adj}}$ | Adjusted oxygen consumption rate   |
| 470 | $\text{MO}_{2\text{br}}$  | Background oxygen consumption rate |
| 471 | MMR                       | Maximum metabolic rate             |
| 472 | RMR                       | Resting metabolic rate             |
| 473 | $\text{S}_{\text{crit}}$  | Critical oxygen saturation         |
| 474 | SMR                       | Standard metabolic rate            |
| 475 | $\% \text{O}_2$           | Oxygen saturation                  |

476 **Tables**

477

478 Table 1. Number of black sea bass used in both the chase and flume MMR trials at each  
479 temperature.

480

| Temperature<br>(°C)   | Sample Sizes     |                  |
|-----------------------|------------------|------------------|
|                       | <i>Chase MMR</i> | <i>Flume MMR</i> |
| 12                    | 16               | 10               |
| 17                    | 16               | 12               |
| 22                    | 16               | 12               |
| 24                    | 17               | 0                |
| 27                    | 30               | 12               |
| 30                    | 17               | 10               |
| 30 <sub>chronic</sub> | 9                | 4                |

481



482 Table 2. ANCOVA results for AS, MMR (both methods) and RMR. Bolded *P*-values are  
483 significant.  
484

| Variable       | Effect             | DF     | <i>F</i> -value | <i>P</i> -value |
|----------------|--------------------|--------|-----------------|-----------------|
| AAS<br>(chase) | Temperature        | 6, 105 | 13.877          | < <b>0.001</b>  |
|                | Weight             | 1, 105 | 2.082           | > 0.05          |
|                | Temperature*weight | 6, 105 | 2.106           | 0.0586          |
| AAS(flume)     | Temperature        | 5, 48  | 6.185           | < <b>0.001</b>  |
|                | Weight             | 1, 48  | 6.599           | < <b>0.05</b>   |
|                | Temperature*weight | 5, 48  | 4.033           | < <b>0.01</b>   |
| MMR<br>(chase) | Temperature        | 6, 105 | 50.327          | < <b>0.001</b>  |
|                | Weight             | 1, 105 | 9.267           | < <b>0.01</b>   |
|                | Temperature*weight | 6, 105 | 2.281           | < <b>0.05</b>   |
| MMR<br>(flume) | Temperature        | 5, 48  | 16.244          | < <b>0.001</b>  |
|                | Weight             | 1, 48  | 8.927           | < <b>0.01</b>   |
|                | Temperature*weight | 5, 48  | 3.147           | < <b>0.05</b>   |
| RMR            | Temperature        | 6, 105 | 136.613         | < <b>0.001</b>  |
|                | Weight             | 1, 105 | 12.282          | < <b>0.001</b>  |
|                | Temperature*weight | 6, 105 | 2.489           | < <b>0.05</b>   |

485

486 Table 3. The  $MO_{2adj}$  mean  $\pm$  S.E. values for RMR, MMR (both methods), AS (both methods)  
487 and  $S_{crit}$  for each temperature treatment. \* = the adjusted  $MO_2$  values for MMR and AAS at  
488 24°C are overestimated due to the average weight of fish in the 24°C group to be smaller than  
489 the average weight for all study fish combined.

490  
491

| Temperature (°C)      | RMR                | Chase MMR           | Flume MMR          | Chase AS            | Flume AS           | $S_{crit}$ (% $O_2$ saturation) |
|-----------------------|--------------------|---------------------|--------------------|---------------------|--------------------|---------------------------------|
| 12                    | 46.44 $\pm$ 1.94   | 169.12 $\pm$ 11.78  | 286.57 $\pm$ 24.02 | 117.67 $\pm$ 7.55   | 242.67 $\pm$ 24.24 | 19.65                           |
| 17                    | 65.27 $\pm$ 3.27   | 215.05 $\pm$ 14.15  | 369.27 $\pm$ 24.47 | 143.63 $\pm$ 11.07  | 303.55 $\pm$ 24.70 | 21.33                           |
| 22                    | 95.69 $\pm$ 4.51   | 266.03 $\pm$ 13.32  | 462.30 $\pm$ 22.01 | 167.18 $\pm$ 12.13  | 363.73 $\pm$ 22.21 | 21.80                           |
| 24                    | 106.61 $\pm$ 11.03 | 342.06 $\pm$ 29.20* | NA                 | 230.39 $\pm$ 36.65* | NA                 | NA                              |
| 27                    | 140.55 $\pm$ 4.48  | 357.44 $\pm$ 8.99   | 497.96 $\pm$ 21.92 | 208.96 $\pm$ 10.24  | 351.65 $\pm$ 22.12 | 31.60                           |
| 30                    | 173.36 $\pm$ 7.05  | 396.65 $\pm$ 11.48  | 479.88 $\pm$ 25.29 | 213.20 $\pm$ 13.33  | 310.20 $\pm$ 25.52 | 37.88                           |
| 30 <sub>chronic</sub> | 163.14 $\pm$ 9.28  | 306.62 $\pm$ 16.06  | 356.82 $\pm$ 53.05 | 136.03 $\pm$ 11.90  | 198.33 $\pm$ 53.54 | 38.63                           |

492

493 Table 4. Q<sub>10</sub> values for AS, MMR (both methods) and RMR separated between each  
494 temperature increment. \* = the slightly overestimated adjusted MO<sub>2</sub> for the 24°C fish is  
495 reflected in calculated Q<sub>10</sub> values.  
496

|                      | 12-17°C | 17-22°C | 22-24°C | 22-27°C | 24-27°C | 27-30°C | 27-30 <sub>c</sub> °C |
|----------------------|---------|---------|---------|---------|---------|---------|-----------------------|
| AS <sub>chase</sub>  | 1.49    | 1.35    | 4.97*   | 1.56    | 0.72*   | 1.07    | 0.24                  |
| AS <sub>flume</sub>  | 1.56    | 1.44    | NA      | 0.93    | NA      | 0.66    | 0.15                  |
| MMR <sub>chase</sub> | 1.62    | 1.53    | 3.51*   | 1.81    | 1.16*   | 1.41    | 0.60                  |
| MMR <sub>flume</sub> | 1.66    | 1.58    | NA      | 1.16    | NA      | 0.88    | 0.33                  |
| RMR                  | 1.96    | 2.15    | 1.72    | 2.16    | 2.51    | 2.01    | 1.64                  |

497  
498

499 **Figures**

500

501 *Figure Captions*

502

503 **Figure 1. Temperature and body weight both affect resting metabolic rate in black sea**  
504 **bass.** RMR (n=121) for each temperature treatment is plotted against body weight (g). A fitted  
505 regression line demonstrates that in addition to the effect of temperature on RMR, body weight  
506 also has an effect ( $P<0.05$ ). 30c = 30<sub>chronic</sub>°C treatment.

507

508 **Figure 2A and 2B. Effect of temperature on resting metabolic rate and maximum**  
509 **metabolic rate measured with a chase and a flume method.** MMR (solid circles) and RMR  
510 (open circles) presented as mean  $\pm$  s.e. normalized to a mean weight of 350g for each  
511 temperature treatment for chase method MMR (A) and flume method MMR (B). RMR is slightly  
512 different between (A) and (B) based on which fish were used for the respective MMR method.  
513 The 30<sub>chronic</sub>°C group is denoted by triangles. Tukey *post hoc* significance between treatments is  
514 shown by letters where data points with different letters indicate a significant difference  
515 ( $P<0.05$ ). **2A:** n=9 for 30<sub>chronic</sub>°C ; n=16 for 12, 17, and 22°C; n=17 for 24 and 30°C; n=30 for  
516 27°C. **2B:** n=4 for 30<sub>chronic</sub>°C; n=10 for 12 and 30°C; n=12 for 17, 22, and 27°C.

517

518 **Figure 3a and 3b. Effect of temperature on black sea bass aerobic scope.** Aerobic scope  
519 (mean  $\pm$  s.e.) of black sea bass normalized around a mean weight of 350g at each temperature  
520 treatment with the 30°C chronic group denoted by the black triangle. Letters indicate Tukey *post*  
521 *hoc* significance between groups where data points sharing a letter are not significantly different  
522 ( $P<0.05$ ). Aerobic scope curves were generated from a) the chase MMR treatment ( $y = 180.17 +$   
523  $89.15x - 15.40x^2 - 21.55x^3$ ;  $R^2 = 0.878$ ) and b) flume MMR treatment ( $y = 314.36 + 63.29x - 68.26x^2 -$   
524  $19.65x^3$ ;  $R^2 = 0.994$ ). **3A:** n=9 for 30<sub>chronic</sub>°C ; n=16 for 12, 17, and 22°C; n=17 for 24 and 30°C;  
525 n=30 for 27°C. **3B:** n=4 for 30<sub>chronic</sub>°C; n=10 for 12 and 30°C; n=12 for 17, 22, and 27°C.

526

527 **Figure 4. S<sub>crit</sub> increases with increasing temperature.** S<sub>crit</sub> presented as %O<sub>2</sub> air saturation for  
528 each temperature treatment. 30<sub>chronic</sub>°C treatment is denoted by a triangle and there is no  
529 significant difference between the 30<sub>chronic</sub>°C and acute 30°C treatments. A linear-regression was  
530 fitted for these data points ( $R_2 = 0.793$ ,  $P<0.001$ ) showing an increase in S<sub>crit</sub> (e.g. a decrease in  
531 hypoxia tolerance) with increasing temperature.

532

533 **Figure 5. S<sub>crit</sub> dependence on resting metabolic rate.** S<sub>crit</sub> is plotted against resting metabolic  
534 rate measured during the hypoxia experiment. A linear-regression was fitted for these data points  
535 ( $R_2 = 0.823$ ,  $P<0.001$ ) and shows an increase in S<sub>crit</sub> as metabolic rates also rise.

536

537 **Figure 6. Factorial aerobic scope and metabolic index response to temperature.** Factorial  
538 aerobic scope (FAS) and metabolic index (MI) plotted against temperature. Trends illustrate a  
539 decreasing trend in both measures as temperature increases. Both FAS and MI are unitless  
540 measures, but both measures scale similarly.

541 *Figures*

542

543 Figure 1.

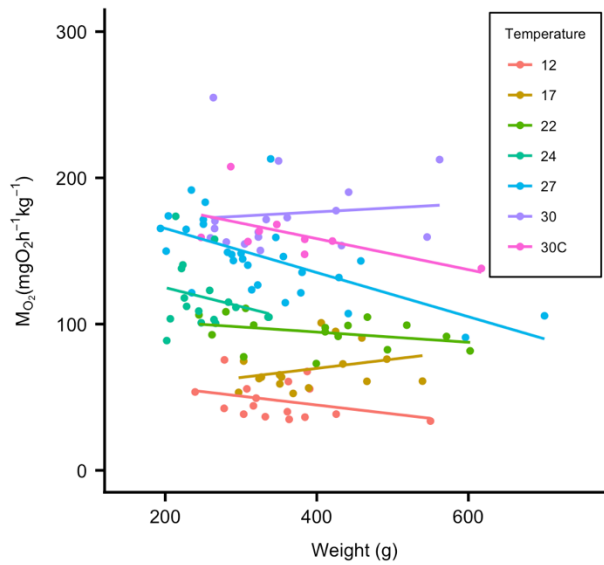

544

545

546 Figure 2.

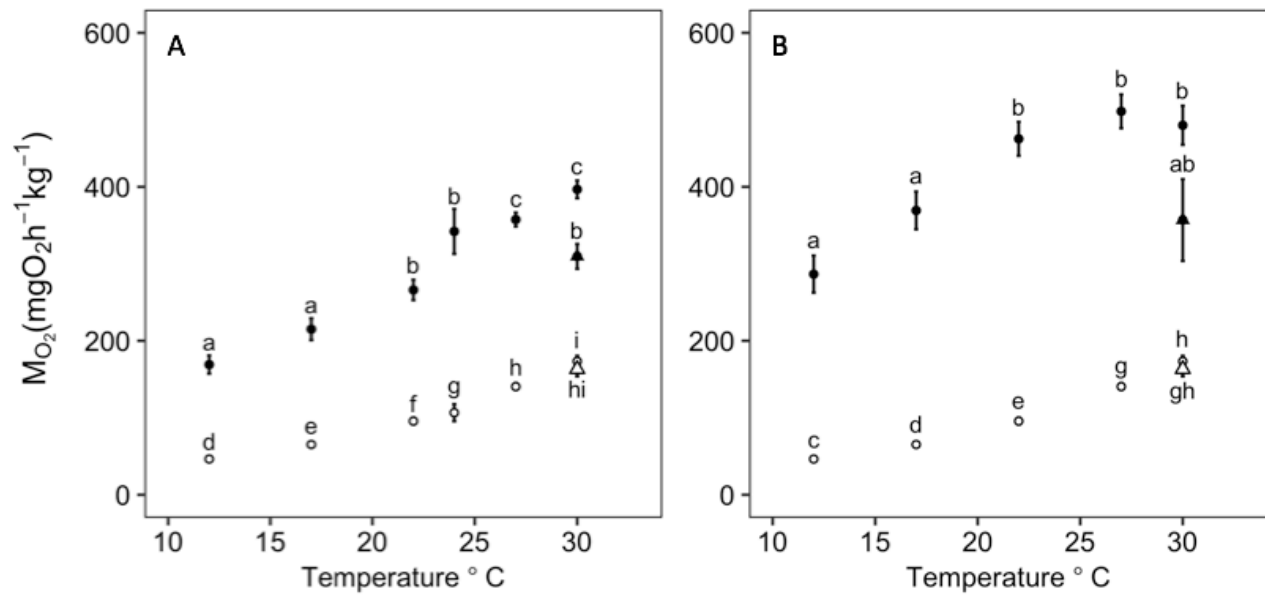

547

548

549

550

551

552

553

554

555

556 Figure 3

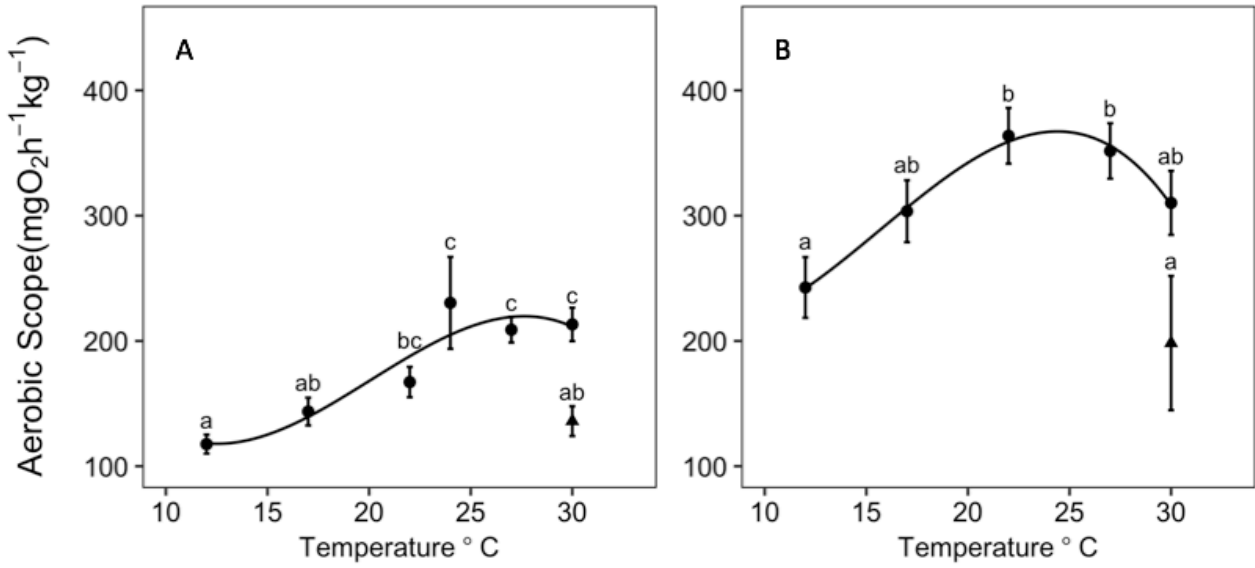

557  
558  
559

Figure 4.

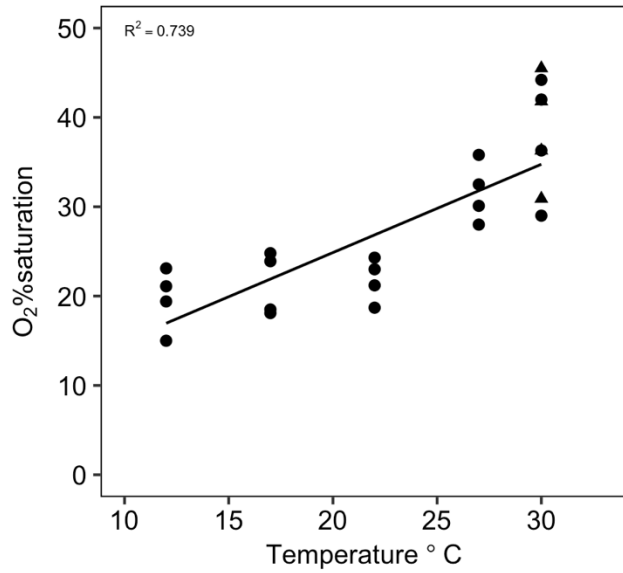

560  
561  
562  
563  
564  
565  
566  
567  
568  
569  
570  
571

572  
573  
574

Figure 5

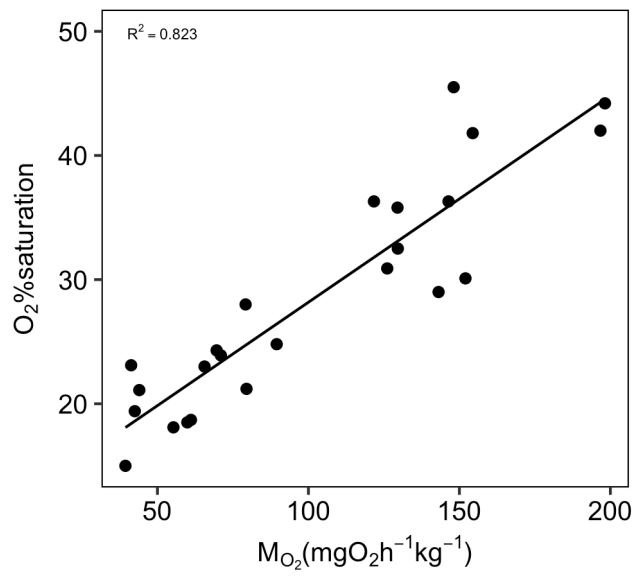

575  
576  
577

Figure 6

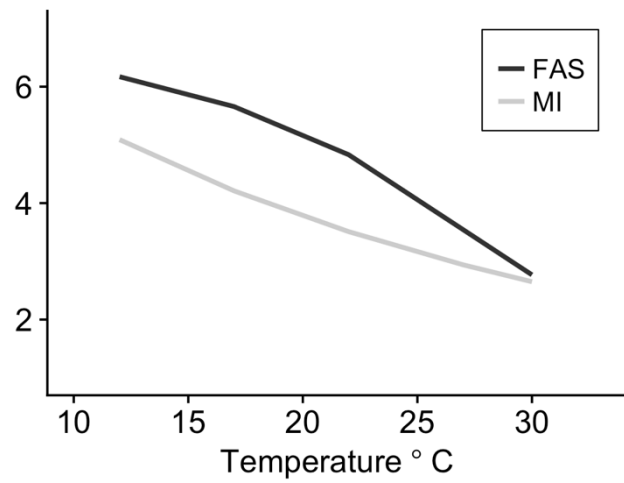

578  
579

580 **References**

- 581 Belkin, I. M. 2009. Rapid warming of Large Marine Ecosystems. *Progress in Oceanography*, 81:  
582 207–213.
- 583 Bell, R. J., Richardson, D. E., Hare, J. A., Lynch, P. D., and Fratantoni, P. S. 2015.  
584 Disentangling the effects of climate, abundance, and size on the distribution of marine fish:  
585 an example based on four stocks from the Northeast US shelf. *ICES Journal of Marine*  
586 *Science*, 72: 1311–1322.
- 587 Caesar, L., Rahmstorf, S., Robinson, A., Feulner, G., and Saba, V. 2018. Observed fingerprint of  
588 a weakening Atlantic Ocean overturning circulation. *Nature*, 556: 191–196.
- 589 Capossela, K. M., Brill, R. W., Fabrizio, M. C., and Bushnell, P. G. 2012. Metabolic and  
590 cardiorespiratory responses of summer flounder *Paralichthys dentatus* to hypoxia at two  
591 temperatures. *Journal of Fish Biology*, 81: 1043–1058.
- 592 Castelao, R., Glenn, S., Schofield, O., Chant, R., Wilkin, J., and Kohut, J. 2008. Seasonal  
593 evolution of hydrographic fields in the central Middle Atlantic Bight from glider  
594 observations. *Geophysical Research Letters*, 35: 6–11.
- 595 Chabot, D., McKenzie, D. J., and Craig, J. F. 2016a. Metabolic rate in fishes: definitions,  
596 methods and significance for conservation physiology. *Journal of Fish Biology*, 88: 1–9.
- 597 Chabot, D., Steffensen, J. F., and Farrell, A. P. 2016b. The determination of standard metabolic  
598 rate in fishes. *Journal of Fish Biology*, 88: 81–121.
- 599 Claireaux, G., Couturier, C., and Groison, A. 2006. Effect of temperature on maximum  
600 swimming speed and cost of transport in juvenile European sea bass (*Dicentrarchus*  
601 *labrax*). *Journal of Experimental Biology*, 209: 3420–3428.
- 602 Claireaux, G., and Chabot, D. 2016. Responses by fishes to environmental hypoxia: integration  
603 through Fry's concept of aerobic metabolic scope. *Journal of Fish Biology*, 88: 232–251.
- 604 Clark, T. D., Sandblom, E., and Jutfelt, F. 2013. Aerobic scope measurements of fishes in an era  
605 of climate change: respirometry, relevance and recommendations. *Journal of Experimental*  
606 *Biology*, 216: 2771–2782.
- 607 Clarke, A., and Johnston, N. 1999. Scaling of metabolic rate with body mass and temperature in  
608 teleost fish. *Journal of Animal Ecology*, 68: 893–905.
- 609 Collins, G. M., Clark, T. D., Rummer, J. L., and Carton, A. G. 2013. Hypoxia tolerance is  
610 conserved across genetically distinct sub-populations of an iconic, tropical Australian  
611 teleost (*Lates calcarifer*). *Conservation Physiology*, 1: doi:10.1093/conphys/cot29.
- 612 Del Toro-Silva, F. M., Miller, J. M., Taylor, J. C., and Ellis, T. A. 2008. Influence of oxygen and  
613 temperature on growth and metabolic performance of *Paralichthys lethostigma*  
614 (Pleuronectiformes: Paralichthyidae). *Journal of Experimental Marine Biology and*  
615 *Ecology*, 358: 113–123.
- 616 Deutsch, C., Ferrel, A., Seibel, B., Pörtner, H. O., and Huey, R. B. 2015. Climate change tightens  
617 a metabolic constraint on marine habitats. *Science*, 348: 1132–1136.
- 618 Ejbye-Ernst, R., Michaelsen, T. Y., Tirsgaard, B., Wilson, J. M., Jensen, L. F., Steffensen, J. F.,  
619 Pertoldi, C., *et al.* 2016. Partitioning the metabolic scope: The importance of anaerobic  
620 metabolism and implications for the oxygen- and capacity-limited thermal tolerance  
621 (OCLTT) hypothesis. *Conservation Physiology*, 4: 1–13.
- 622 Fabrizio, M. C., Manderson, J. P., and Pessutti, J. P. 2013. Habitat associations and dispersal of  
623 black sea bass from a mid-Atlantic Bight reef. *Marine Ecology Progress Series*, 482: 241–  
624 253.
- 625 Farrell, A. P., Hinch, S. G., Cooke, S. J., Patterson, D. A., Crossin, G. T., Lapointe, M., and



- 626 Mathes, M. T. 2008. Pacific salmon in hot water: applying aerobic scope models and  
627 biotelemetry to predict the success of spawning migrations. *Physiological and Biochemical*  
628 *Zoology*, 81: 697–709.
- 629 Farrell, A. P. 2016. Pragmatic perspective on aerobic scope: peaking, plummeting, pejus and  
630 apportioning. *Journal of Fish Biology*, 88: 322–343.
- 631 Friedland, K. D., and Hare, J. A. 2007. Long-term trends and regime shifts in sea surface  
632 temperature on the continental shelf of the northeast United States. *Continental Shelf*  
633 *Research*, 27: 2313–2328.
- 634 Glenn, S., Arnone, R., Bergmann, T., Bissett, W. P., Crowley, M., Cullen, J., Gryzmski, J., *et al.*  
635 2004. Biogeochemical impact of summertime coastal upwelling on the New Jersey Shelf.  
636 *Journal of Geophysical Research C: Oceans*, 109: 1–15.
- 637 Hare, J. A., Morrison, W. E., Nelson, M. W., Stachura, M. M., Teeters, E. J., Griffis, R. B.,  
638 Alexander, M. A., *et al.* 2016. A vulnerability assessment of fish and invertebrates to  
639 climate change on the northeast u.s. continental shelf. *PLoS ONE*, 11: e0146756.
- 640 Healy, T. M., and Schulte, P. M. 2012. Thermal acclimation is not necessary to maintain a wide  
641 thermal breadth of aerobic scope in the common killifish (*Fundulus heteroclitus*).  
642 *Physiological and Biochemical Zoology*, 85: 107–119.
- 643 Holt, R. E., and Jørgensen, C. 2015. Climate change in fish: effects of respiratory constraints on  
644 optimal life history and behaviour. *Biology Letters*, 11: 20141032.
- 645 Houghton, R. W., Schlitz, R., Beardsley, R. C., Butman, B., and Chamberlin, J. L. 1982. The  
646 Middle Atlantic Bight Cold Pool: Evolution of the Temperature Structure During Summer  
647 1979. *Journal of Physical Oceanography*, 12: 1019–1029.
- 648 Kavanaugh, M. T., Rheuban, J. E., Luis, K. M. A., and Doney, S. C. 2017. Thirty-three years of  
649 ocean benthic warming along the U.S. Northeast Continental shelf and slope: patterns,  
650 drivers, and ecological consequences. *Journal of Geophysical Research: Oceans*: 1–16.
- 651 Killen, S. S., Norin, T., and Halsey, L. G. 2017. Do method and species lifestyle affect measures  
652 of maximum metabolic rate in fishes? *Journal of Fish Biology*, 90: 1037–1046.
- 653 Kleisner, K. M., Fogarty, M. J., McGee, S., Barnett, A., Fratantoni, P., Greene, J., Hare, J. A., *et*  
654 *al.* 2016. The effects of sub-regional climate velocity on the distribution and spatial extent  
655 of marine species assemblages. *PLoS ONE*, 11: 1–21.
- 656 Kleisner, K. M., Fogarty, M. J., McGee, S., Hare, J. A., Moret, S., Perretti, C. T., and Saba, V. S.  
657 2017. Marine species distribution shifts on the U.S. Northeast Continental Shelf under  
658 continued ocean warming. *Progress in Oceanography*, 153: 24–36.
- 659 Lapointe, D., Vogelbein, W. K., Fabrizio, M. C., Gauthier, D. T., and Brill, R. W. 2014.  
660 Temperature, hypoxia, and mycobacteriosis: effects on adult striped bass *Morone saxatilis*  
661 metabolic performance. *Diseases of Aquatic Organisms*, 108: 113–127.
- 662 Lefevre, S., McKenzie, D. J., and Nilsson, G. E. 2017. Models projecting the fate of fish  
663 populations under climate change need to be based on valid physiological mechanisms.  
664 *Global Change Biology*, 23: 3449–3459.
- 665 Mallekh, R., and Lagardère, J. P. 2002. Effect of temperature and dissolved oxygen  
666 concentration on the metabolic rate of the turbot and the relationship between metabolic  
667 scope and feeding demand. *Journal of Fish Biology*, 60: 1105–1115.
- 668 Manderson, J., Palamara, L., Kohut, J., and Oliver, M. J. 2011. Ocean observatory data is useful  
669 for regional habitat modeling of species with different vertical habitat preferences. *Marine*  
670 *Ecology Progress Series*, 438: 1–17.
- 671 McDonnell, L. H., and Chapman, L. J. 2015. At the edge of the thermal window: effects of

- 672 elevated temperature on the resting metabolism, hypoxia tolerance and upper critical  
673 thermal limit of a widespread African cichlid. *Conservation Physiology*, 3: 1–13.
- 674 Morley, J. W., Selden, R. L., Latour, R. J., Frölicher, T. L., Seagraves, R. J., and Pinsky, M. L.  
675 2018. Projecting shifts in thermal habitat for 686 species on the North American continental  
676 shelf. *PLoS ONE*, 13: 1–28.
- 677 Moser, J., and Shepherd, G. R. 2008. Seasonal distribution and movement of black sea bass  
678 (*Centropristis striata*) in the Northwest Atlantic as determined from a mark-recapture  
679 experiment. *Journal of Northwest Atlantic Fishery Science*, 40: 17–28.
- 680 Musick, J. A., and Mercer, L. P. 1977. Seasonal distribution of Black Sea Bass, *Centropristis*  
681 *striata*, in the Mid-Atlantic Bight with comments on ecology and fisheries of the species.  
682 *Trans. Amer. Fish. Soc.*, 106: 12–25.
- 683 NEFSC. 2017. The 62nd northeast regional stock assessment workshop (62nd SAW). Ref. Doc.  
684 17-03, NEFSC, Woods Hole, MA.
- 685 Nilsson, G. E., and Renshaw, G. M. C. 2004. Hypoxic survival strategies in two fishes: extreme  
686 anoxia tolerance in the North European crucian carp and natural hypoxic preconditioning in  
687 a coral-reef shark. *The Journal of Experimental Biology*, 207: 3131–3139.
- 688 Norin, T., Malte, H., and Clark, T. D. 2014. Aerobic scope does not predict the performance of a  
689 tropical eurythermal fish at elevated temperatures. *The Journal of Experimental Biology*,  
690 217: 244–251.
- 691 Norin, T., and Clark, T. D. 2016. Measurement and relevance of maximum metabolic rate in  
692 fishes. *Journal of Fish Biology*, 88: 122–151.
- 693 Nye, J. A., Link, J. S., Hare, J. A., and Overholtz, W. J. 2009. Changing spatial distribution of  
694 fish stocks in relation to climate and population size on the Northeast United States  
695 continental shelf. *Marine Ecology Progress Series*, 393: 111–129.
- 696 Pershing, A. J., Alexander, M. A., Hernandez, C. M., Kerr, L. A., Le Bris, A., Mills, K. E., Nye,  
697 J. A., *et al.* 2015. Slow adaptation in the face of rapid warming leads to collapse of the Gulf  
698 of Maine cod fishery. *Science*, 350: 809–812.
- 699 Pinsky, M. L., Worm, B., Fogarty, M. J., Sarmiento, J. L., and Levin, S. A. 2013. Marine taxa  
700 track local climate velocities. *Science*, 341: 1239–1242.
- 701 Pinsky, M. L., Reygondeau, G., Caddell, R., Palacios-Abrantes, J., Spijkers, J., and Cheung, W.  
702 W. L. 2018. Preparing ocean governance for species on the move. *Science*, 360: 1189–  
703 1192.
- 704 Plambech, M., Van Deurs, M., Steffensen, J. F., Tirsgaard, B., and Behrens, J. W. 2013. Excess  
705 post-hypoxic oxygen consumption in Atlantic cod *Gadus morhua*. *Journal of Fish Biology*,  
706 83: 396–403.
- 707 Pörtner, H. O., and Knust, R. 2007. Climate change affects marine fishes through the oxygen  
708 limitation of thermal tolerance. *Science*, 315: 95–97.
- 709 Pörtner, H. O., and Farrell, A. P. 2008. Physiology and climate change. *Science*, 322: 690–692.
- 710 Pörtner, H. O. 2010. Oxygen- and capacity-limitation of thermal tolerance: a matrix for  
711 integrating climate-related stressor effects in marine ecosystems. *Journal of Experimental*  
712 *Biology*, 213: 881–893.
- 713 Pörtner, H. O., and Peck, M. A. 2010. Climate change effects on fishes and fisheries: towards a  
714 cause-and-effect understanding. *Journal of Fish Biology*, 77: 1745–1779.
- 715 R Core Team. 2017. R: A language and environment for statistical computing. R Foundation for  
716 Statistical Computing, Vienna, Austria. URL <https://www.R-project.org/>
- 717 Raby, G. D., Casselman, M. T., Cooke, S. J., Hinch, S. G., Farrell, A. P., and Clark, T. D. 2016.

- 718 Aerobic scope increases throughout an ecologically relevant temperature range in coho  
719 salmon. *The Journal of Experimental Biology*, 219: 1922–1931.
- 720 Reidy, S. P., Nelson, J. A., Tang, Y., and Kerr, S. R. 1995. Post-exercise metabolic rate in  
721 Atlantic cod and its dependence upon the method of exhaustion. *Journal of Fish Biology*,  
722 47: 377–386.
- 723 Rodgers, G. G., Tenzing, P., and Clark, T. D. 2016. Experimental methods in aquatic  
724 respirometry: the importance of mixing devices and accounting for background respiration.  
725 *Journal of Fish Biology*, 88: 65–80.
- 726 Rogers, N. J., Urbina, M. A., Reardon, E. E., McKenzie, D. J., and Wilson, R. W. 2016. A new  
727 analysis of hypoxia tolerance in fishes using a database of critical oxygen level ( $P_{crit}$ ).  
728 *Conservation Physiology*, 4: cow012.
- 729 Roy, E. M., Quattro, J. M., and Greig, T. W. 2012. Genetic management of black sea bass:  
730 influence of biogeographic barriers on population structure. *Marine and Coastal Fisheries*,  
731 4: 391–402.
- 732 Saba, V. S., Griffies, S. M., Anderson, W. G., Winton, M., Alexander, M. A., Delworth, T. L.,  
733 Hare, J. A., *et al.* 2016. Enhanced warming of the Northwest Atlantic Ocean under climate  
734 change. *Journal of Geophysical Research: Oceans*, 120: 1–15.
- 735 Sandblom, E., Gräns, A., Axelsson, M., and Seth, H. 2014. Temperature acclimation rate of  
736 aerobic scope and feeding metabolism in fishes: implications in a thermally extreme future.  
737 *Proceedings of Royal Society of Biology*, 281: 20141490.
- 738 Schofield, O., Roarty, H., Saba, G. K., Xu, Y., Kohut, J., Glenn, S., Manderson, J., *et al.* 2012.  
739 Phytoplankton dynamics and bottom water oxygen during a large bloom in the summer of  
740 2011. *Oceans, 2012, IEEE*: 1–6.
- 741 Schulte, P. M. 2015. The effects of temperature on aerobic metabolism: towards a mechanistic  
742 understanding of the responses of ectotherms to a changing environment. *The Journal of*  
743 *Experimental Biology*, 218: 1856–1866.
- 744 Schurmann, H., and Steffensen, J. F. 1997. Effects of temperature, hypoxia and activity on the  
745 metabolism of juvenile Atlantic cod. *Journal of Fish Biology*, 50: 1166–1180.
- 746 Seibel, B. 2011. Critical oxygen levels and metabolic suppression in oceanic oxygen minimum  
747 zones. *The Journal of Experimental Biology*, 214: 326–336.
- 748 Steimle, F., Zetlin, C., Berrien, P., and Chang, S. 1999. Essential fish habitat source document:  
749 Black sea bass, *Centropristis striata*, life history and habitat characteristics. NOAA Tech  
750 Memo NMFS NE 143: 42.
- 751 Svendsen, J. C., Tudorache, C., Jordan, A. D., Steffensen, J. F., Aarestrup, K., and Domenici, P.  
752 2010. Partition of aerobic and anaerobic swimming costs related to gait transitions in a  
753 labriform swimmer. *Journal of Experimental Biology*, 213: 2177–2183.
- 754 Svendsen, M. B. S., Bushnell, P. G., and Steffensen, J. F. 2016a. Design and setup of  
755 intermittent-flow respirometry system for aquatic organisms. *Journal of Fish Biology*, 88:  
756 26–50.
- 757 Svendsen, M. B. S., Bushnell, P. G., Christensen, E. A. F., and Steffensen, J. F. 2016b. Sources  
758 of variation in oxygen consumption of aquatic animals demonstrated by simulated constant  
759 oxygen consumption and respirometers of different sizes. *Journal of Fish Biology*, 88: 51–  
760 64.
- 761 Verberk, W. C. E. P., Bartolini, F., Marshall, D. J., Pörtner, H. O., Terblanche, J. S., White, C.  
762 R., and Giomi, F. 2016. Can respiratory physiology predict thermal niches? *Annals of the*  
763 *New York Academy of Sciences*, 1365: 73–88.

- 764 Wikelski, M., and Cooke, S. J. 2006. Conservation physiology. *Trends in Ecology and*  
765 *Evolution*, 21: 38–46.
- 766 Wilkin, J. L., and Hunter, E. J. 2013. An assessment of the skill of real-time models of Mid-  
767 Atlantic Bight continental shelf circulation. *Journal of Geophysical Research: Oceans*, 118:  
768 2919–2933.
- 769 Wishner, K. F., Seibel, B. A., Roman, C., Deutsch, C., Outram, D., Shaw, C. T., Birk, M. A., *et*  
770 *al.* 2018. Ocean deoxygenation and zooplankton: very small oxygen differences matter.  
771 *Science Advances*, 4: eaau5180.
- 772 Yamanaka, H., Kohmatsu, Y., and Yuma, M. 2007. Difference in the hypoxia tolerance of the  
773 round crucian carp and largemouth bass: Implications for physiological refugia in the  
774 macrophyte zone. *Ichthyological Research*, 54: 308–312.
- 775 Yeager, G. R., and Ultsch, D. P. 1989. Physiological regulation and conformation : A BASIC  
776 program for the determination of critical points. *Physiological Zoology*, 62: 888–907.
